# Supplementary material for: Does the occurrence of resonance (by the delocalization of radical/cationic/anionic charges) induce the existence of intramolecular halogen–halogen contacts?
Source: Royal Society of Chemistry journal article supplement (doi:10.1039/c6ra14270b), 2016-01-01
Supplement: c6ra14270b1.pdf [file c6ra14270b1.pdf]

### Supporting Information

## **Does the occurrence of resonance (by the delocalization of radical/cationic/anionic charges) induce the existences of intra molecular halogen --- halogen contacts?**

B. Vijaya Pandiyan,<sup>a</sup> P. Deepa,<sup>b</sup> and P.Kolandaivel,<sup>\*a</sup>

**Scheme S1: Substitution classification table.**

**Table S1: sigma hole values ( $V_{s, \max}$ ) for cation/anionic systems and radical system with substituted systems**

**Table S2: intra molecular halogen --- halogen bond length for cation/anionic systems and radical system with substituted systems**

**Table S3: C – C – C angle for cation/anionic systems and radical system with substituted systems**

**Table S4: intra molecular halogen --- halogen bond angle for cation/anionic systems and radical system with substituted systems**

**Table S5: electron density of BCP for cation/anionic systems and radical system with substituted systems**

**Table S6: laplacian electron density of BCP for cation/anionic systems and radical system with substituted systems**

**Table S7: energy of BCP for cation/anionic systems and radical system with substituted systems**

**Table S8: ellipticity of BCP for cation/anionic systems and radical system with substituted systems**

| R <sub>1</sub>  | R <sub>2</sub>  | R <sub>3</sub>  |                           |
|-----------------|-----------------|-----------------|---------------------------|
| H               | H               | H               | (i)                       |
| NO <sub>2</sub> | H               | H               | EWG only (ii)             |
| H               | NO <sub>2</sub> | H               |                           |
| H               | H               | NO <sub>2</sub> |                           |
| CH <sub>3</sub> | H               | H               | EDG only (iii)            |
| H               | CH <sub>3</sub> | H               |                           |
| H               | H               | CH <sub>3</sub> |                           |
| NO <sub>2</sub> | H               | CH <sub>3</sub> | Both<br>EWG &<br>EDG (iv) |
| H               | NO <sub>2</sub> | CH <sub>3</sub> |                           |
| CH <sub>3</sub> | H               | NO <sub>2</sub> |                           |
| NO <sub>2</sub> | CH <sub>3</sub> | H               |                           |
| CH <sub>3</sub> | NO <sub>2</sub> | H               |                           |
| H               | CH <sub>3</sub> | NO <sub>2</sub> |                           |

**Scheme S1: Substitution classification table.**

**Table S1: sigma hole values ( $V_{s, \max}$ ) for cation/anionic systems and radical system with substituted systems**

| $R_1, R_2, R_3$                       | Homo X---X interactions |         |        | Hetero X --- X interactions |        |        |
|---------------------------------------|-------------------------|---------|--------|-----------------------------|--------|--------|
|                                       | Br---Br                 | Cl---Cl | F---F  | Br---Cl                     | Br---F | Cl---F |
| cH, H,H                               | 0.4196                  | 0.4582  | 0.4661 | 0.4290                      | 0.4529 | 0.4592 |
| aH, H,H                               | 0.0251                  | 0.0201  | 0.0254 | 0.0025                      | 0.0076 | 0.0406 |
| rH, H,H                               | 0.1389                  | 0.1169  | 0.1328 | 0.1195                      | 0.1347 | 0.1203 |
| NO <sub>2</sub> , H, H                | 0.1952                  | 0.1657  | 0.1860 | 0.1732                      | 0.1736 | 0.1584 |
| H, NO <sub>2</sub> , H                | 0.1917                  | 0.1641  | 0.1755 | 0.1657                      | 0.1729 | 0.1626 |
| H, H, NO <sub>2</sub>                 | 0.1952                  | 0.1657  | 0.1860 | 0.1610                      | 0.1748 | 0.1726 |
| CH <sub>3</sub> , H, H                | 0.1352                  | 0.1151  | 0.1282 | 0.1125                      | 0.1329 | 0.1173 |
| H, CH <sub>3</sub> , H                | 0.1351                  | 0.1116  | 0.1287 | 0.1159                      | 0.1309 | 0.1165 |
| H, H, CH <sub>3</sub>                 | 0.1352                  | 0.1151  | 0.1282 | 0.1150                      | 0.1211 | 0.1181 |
| NO <sub>2</sub> , H, CH <sub>3</sub>  | 0.1713                  | 0.1559  | 0.1858 | 0.1658                      | 0.1704 | 0.1557 |
| H, NO <sub>2</sub> , CH <sub>3</sub>  | 0.1953                  | 0.1547  | 0.1599 | 0.1589                      | 0.1664 | 0.1491 |
| CH <sub>3</sub> , H, NO <sub>2</sub>  | 0.1714                  | 0.1559  | 0.1758 | 0.1502                      | 0.1697 | 0.1605 |
| NO <sub>2</sub> , CH <sub>3</sub> , H | 0.1730                  | 0.1612  | 0.1743 | 0.1651                      | 0.1679 | 0.1526 |
| CH <sub>3</sub> , NO <sub>2</sub> , H | 0.1953                  | 0.1547  | 0.1599 | 0.1532                      | 0.1600 | 0.1506 |
| H, CH <sub>3</sub> , NO <sub>2</sub>  | 0.1730                  | 0.1612  | 0.1743 | 0.1502                      | 0.1622 | 0.1611 |

c- cation structure. a - anion structure. r – radical structure.

**Table S2: intra molecular halogen --- halogen bond length for cation/anionic systems and radical system with substituted systems**

| 1,3 2                                 | Br---Br | Cl---Cl | F---F | Br---Cl | Br---F | Cl---F |
|---------------------------------------|---------|---------|-------|---------|--------|--------|
| $\Sigma_{VDW}$                        | 3.70    | 3.50    | 2.94  | 3.60    | 3.32   | 3.22   |
| cH, H, H                              | 3.36    | 3.17    | 2.61  | 3.26    | 2.97   | 2.88   |
| aH, H, H                              | 3.60    | 3.44    | 3.01  | 3.52    | 3.26   | 3.20   |
| rH, H,H                               | 3.46    | 3.27    | 2.76  | 3.36    | 3.08   | 3.00   |
| NO <sub>2</sub> , H, H                | 3.44    | 3.24    | 2.73  | 3.32    | 3.06   | 2.97   |
| H, NO <sub>2</sub> , H                | 3.42    | 3.23    | 2.70  | 3.33    | 3.03   | 2.95   |
| H, H, NO <sub>2</sub>                 | 3.44    | 3.24    | 2.73  | 3.34    | 3.06   | 2.98   |
| CH <sub>3</sub> , H, H                | 3.42    | 3.23    | 2.72  | 3.33    | 3.04   | 2.96   |
| H, CH <sub>3</sub> , H                | 3.40    | 3.21    | 2.69  | 3.30    | 3.02   | 2.93   |
| H, H, CH <sub>3</sub>                 | 3.42    | 3.23    | 2.72  | 3.33    | 3.05   | 2.96   |
| NO <sub>2</sub> , H, CH <sub>3</sub>  | 3.40    | 3.21    | 2.68  | 3.30    | 3.01   | 2.93   |
| H, NO <sub>2</sub> , CH <sub>3</sub>  | 3.39    | 3.19    | 2.64  | 3.29    | 2.99   | 2.91   |
| CH <sub>3</sub> , H, NO <sub>2</sub>  | 3.40    | 3.21    | 2.68  | 3.34    | 3.02   | 2.93   |
| NO <sub>2</sub> , CH <sub>3</sub> , H | 3.35    | 3.13    | 2.55  | 3.23    | 2.90   | 2.81   |
| CH <sub>3</sub> , NO <sub>2</sub> , H | 3.39    | 3.19    | 2.64  | 3.29    | 2.99   | 2.83   |
| H, CH <sub>3</sub> , NO <sub>2</sub>  | 3.35    | 3.13    | 2.55  | 3.24    | 3.02   | 2.83   |

c- cation structure. a - anion structure. r – radical structure.

**Table S3: C – C – C angle for cation/anionic systems and radical system with substituted systems**

| R <sub>1</sub> , R <sub>2</sub> , R <sub>3</sub> | Homo X---X interactions |         |       | Hetero X --- X interactions |        |        |
|--------------------------------------------------|-------------------------|---------|-------|-----------------------------|--------|--------|
|                                                  | Br---Br                 | Cl---Cl | F---F | Br---Cl                     | Br---F | Cl---F |
| cH, H,H                                          | 2.514                   | 2.500   | 2.430 | 2.506                       | 2.468  | 2.462  |
| aH, H,H                                          | 2.592                   | 2.585   | 2.555 | 2.588                       | 2.568  | 2.567  |
| rH, H,H                                          | 2.520                   | 2.511   | 2.464 | 2.515                       | 2.487  | 2.485  |
| NO <sub>2</sub> , H, H                           | 2.501                   | 2.487   | 2.431 | 2.492                       | 2.457  | 2.453  |
| H, NO <sub>2</sub> , H                           | 2.526                   | 2.518   | 2.478 | 2.523                       | 2.498  | 2.496  |
| H, H, NO <sub>2</sub>                            | 2.501                   | 2.487   | 2.431 | 2.496                       | 2.467  | 2.460  |
| CH <sub>3</sub> , H, H                           | 2.533                   | 2.522   | 2.469 | 2.526                       | 2.493  | 2.490  |
| H, CH <sub>3</sub> , H                           | 2.493                   | 2.483   | 2.433 | 2.488                       | 2.459  | 2.456  |
| H, H, CH <sub>3</sub>                            | 2.533                   | 2.522   | 2.469 | 2.528                       | 2.500  | 2.495  |
| NO <sub>2</sub> , H, CH <sub>3</sub>             | 2.516                   | 2.500   | 2.437 | 2.507                       | 2.471  | 2.466  |
| H, NO <sub>2</sub> , CH <sub>3</sub>             | 2.545                   | 2.536   | 2.484 | 2.541                       | 2.516  | 2.512  |
| CH <sub>3</sub> , H, NO <sub>2</sub>             | 2.516                   | 2.500   | 2.437 | 2.503                       | 2.474  | 2.467  |
| NO <sub>2</sub> , CH <sub>3</sub> , H            | 2.463                   | 2.449   | 2.386 | 2.454                       | 2.412  | 2.410  |
| CH <sub>3</sub> , NO <sub>2</sub> , H            | 2.545                   | 2.536   | 2.484 | 2.538                       | 2.506  | 2.497  |
| H, CH <sub>3</sub> , NO <sub>2</sub>             | 2.463                   | 2.449   | 2.386 | 2.458                       | 2.430  | 2.421  |

c- cation structure. a - anion structure. r – radical structure.

**Table S4: intra molecular halogen --- halogen bond angle for cation/anionic systems and radical system with substituted systems**

|                 |                                                  | Homo X---X interactions |         |       | Hetero X --- X interactions |        |        |                |
|-----------------|--------------------------------------------------|-------------------------|---------|-------|-----------------------------|--------|--------|----------------|
|                 | R <sub>1</sub> , R <sub>2</sub> , R <sub>3</sub> | Br---Br                 | Cl---Cl | F---F | Br---Cl                     | Br---F | Cl---F |                |
| c- cation       | cH, H,H                                          | 76.36                   | 78.32   | 85.99 | 80.31                       | 93.45  | 91.27  | structure.     |
| a - anion       |                                                  | 76.36                   | 78.32   | 85.99 | 74.48                       | 69.87  | 73.49  | structure.     |
| r –             | aH, H,H                                          | 74.56                   | 76.03   | 80.74 | 77.82                       | 87.87  | 85.76  | radical        |
| structure.      |                                                  | 74.56                   | 76.03   | 80.74 | 72.91                       | 69.26  | 72.03  |                |
|                 | rH, H,H                                          | 75.36                   | 77.16   | 83.57 | 79.10                       | 90.88  | 88.65  |                |
| <b>Table</b>    |                                                  | 75.36                   | 77.16   | 83.57 | 73.58                       | 69.56  | 72.87  | <b>S5:</b>     |
| <b>electron</b> | NO <sub>2</sub> , H, H                           | 75.63                   | 77.17   | 82.85 | 79.14                       | 90.25  | 87.97  | <b>density</b> |
| <b>of BCP</b>   |                                                  | 74.89                   | 76.98   | 84.07 | 73.33                       | 69.66  | 73.07  | <b>for</b>     |
|                 | H, NO <sub>2</sub> , H                           | 75.85                   | 77.88   | 85.22 | 79.80                       | 92.50  | 90.33  |                |
|                 |                                                  | 75.85                   | 77.88   | 85.22 | 74.02                       | 70.10  | 73.67  |                |
|                 | H, H, NO <sub>2</sub>                            | 75.63                   | 77.17   | 82.85 | 78.67                       | 90.74  | 88.75  |                |
|                 |                                                  | 74.89                   | 76.98   | 84.07 | 73.78                       | 69.43  | 72.58  |                |
|                 | CH <sub>3</sub> , H, H                           | 77.53                   | 79.32   | 85.59 | 81.24                       | 93.15  | 90.90  |                |
|                 |                                                  | 74.75                   | 76.71   | 83.48 | 73.07                       | 69.25  | 72.58  |                |
|                 | H, CH <sub>3</sub> , H                           | 75.74                   | 77.66   | 84.56 | 79.83                       | 92.20  | 89.90  |                |
|                 |                                                  | 75.92                   | 77.82   | 84.59 | 73.89                       | 69.72  | 73.20  |                |
|                 | H, H, CH <sub>3</sub>                            | 77.53                   | 79.32   | 85.59 | 78.53                       | 90.58  | 88.42  |                |
|                 |                                                  | 74.75                   | 76.71   | 83.48 | 75.67                       | 71.38  | 74.73  |                |
|                 | NO <sub>2</sub> , H, CH <sub>3</sub>             | 75.16                   | 76.77   | 83.03 | 78.72                       | 90.06  | 87.91  |                |
|                 |                                                  | 77.05                   | 79.08   | 86.29 | 75.42                       | 71.61  | 75.05  |                |
|                 | H, NO <sub>2</sub> , CH <sub>3</sub>             | 74.43                   | 76.51   | 84.42 | 78.36                       | 98.05  | 88.92  |                |
|                 |                                                  | 79.06                   | 81.09   | 88.74 | 77.24                       | 73.08  | 76.70  |                |
|                 | CH <sub>3</sub> , H, NO <sub>2</sub>             | 75.16                   | 76.77   | 83.03 | 81.69                       | 93.08  | 91.09  |                |
|                 |                                                  | 77.05                   | 79.08   | 86.29 | 71.18                       | 69.21  | 72.43  |                |
|                 | NO <sub>2</sub> , CH <sub>3</sub> , H            | 76.51                   | 79.00   | 87.49 | 80.99                       | 95.85  | 93.37  |                |
|                 |                                                  | 75.43                   | 77.33   | 85.35 | 73.39                       | 69.27  | 73.01  |                |
|                 | CH <sub>3</sub> , NO <sub>2</sub> , H            | 74.43                   | 76.51   | 84.42 | 83.04                       | 96.12  | 96.46  |                |
|                 |                                                  | 79.06                   | 81.09   | 88.74 | 72.74                       | 69.11  | 72.67  |                |
|                 | H, CH <sub>3</sub> , NO <sub>2</sub>             | 76.51                   | 79.00   | 87.49 | 79.48                       | 92.96  | 90.31  |                |
|                 |                                                  | 75.43                   | 77.33   | 85.35 | 74.68                       | 68.15  | 74.87  |                |

**cation/anionic systems and radical system with substituted systems**

| 1,3 2                                 | Br---Br | Cl---Cl | F---F  | Br---Cl | Br---F | Cl---F |
|---------------------------------------|---------|---------|--------|---------|--------|--------|
| cH, H,H                               | 0.0146  | 0.0142  | 0.0112 | 0.0144  | 0.0128 | 0.0126 |
| aH, H,H                               | 0.0094  | 0.0082  | ----   | 0.0087  | 0.0079 | 0.0067 |
| rH, H,H                               | 0.0120  | 0.0114  | 0.0088 | 0.0117  | 0.0112 | 0.0102 |
| NO <sub>2</sub> , H, H                | 0.0127  | 0.0119  | 0.0093 | 0.0124  | 0.0113 | 0.0108 |
| H, NO <sub>2</sub> , H                | 0.0128  | 0.0122  | 0.0101 | 0.0124  | 0.0119 | 0.0115 |
| H, H, NO <sub>2</sub>                 | 0.0127  | 0.0119  | 0.0093 | 0.0124  | 0.0113 | 0.0108 |
| CH <sub>3</sub> , H, H                | 0.0128  | 0.0123  | 0.0096 | 0.0125  | 0.0117 | 0.0112 |
| H, CH <sub>3</sub> , H                | 0.0132  | 0.0128  | 0.0105 | 0.0130  | 0.0123 | 0.0118 |
| H, H, CH <sub>3</sub>                 | 0.0128  | 0.0123  | 0.0096 | 0.0125  | 0.0117 | 0.0112 |
| NO <sub>2</sub> , H, CH <sub>3</sub>  | 0.0134  | 0.0128  | 0.0104 | 0.0131  | 0.0129 | 0.0118 |
| H, NO <sub>2</sub> , CH <sub>3</sub>  | 0.0136  | 0.0131  | 0.0115 | 0.0134  | 0.0131 | 0.0126 |
| CH <sub>3</sub> , H, NO <sub>2</sub>  | 0.0134  | 0.0128  | 0.0104 | 0.0121  | 0.0129 | 0.0118 |
| NO <sub>2</sub> , CH <sub>3</sub> , H | 0.0147  | 0.0147  | 0.0140 | 0.0148  | 0.0155 | 0.0152 |
| CH <sub>3</sub> , NO <sub>2</sub> , H | 0.0136  | 0.0131  | 0.0115 | 0.0134  | 0.0136 | 0.0146 |
| H, CH <sub>3</sub> , NO <sub>2</sub>  | 0.0147  | 0.0147  | 0.0140 | 0.0146  | 0.0123 | 0.0147 |

c-cation system, r-radical system, a- anionic system

**Table S6: laplacian electron density of BCP for cation/anionic systems and radical system with substituted systems**

| 1,3 2                                 | Br---Br | Cl---Cl | F---F  | Br---Cl | Br---F | Cl---F |
|---------------------------------------|---------|---------|--------|---------|--------|--------|
| H, H,H                                | 0.0446  | 0.0549  | 0.0736 | 0.0496  | 0.0576 | 0.0634 |
| H, H,H                                | 0.0283  | 0.0319  | ----   | 0.0305  | 0.0299 | 0.0305 |
| H, H,H                                | 0.0374  | 0.0446  | 0.0482 | 0.0400  | 0.0438 | 0.0469 |
| NO <sub>2</sub> , H, H                | 0.0378  | 0.0473  | 0.0531 | 0.0425  | 0.0472 | 0.0502 |
| H, NO <sub>2</sub> , H                | 0.0384  | 0.0485  | 0.0557 | 0.0441  | 0.0494 | 0.0534 |
| H, H, NO <sub>2</sub>                 | 0.0378  | 0.0473  | 0.0531 | 0.0424  | 0.0472 | 0.0502 |
| CH <sub>3</sub> , H, H                | 0.0395  | 0.0480  | 0.0523 | 0.0438  | 0.0476 | 0.0510 |
| H, CH <sub>3</sub> , H                | 0.0482  | 0.0504  | 0.0577 | 0.0458  | 0.0509 | 0.0550 |
| H, H, CH <sub>3</sub>                 | 0.0395  | 0.0480  | 0.0523 | 0.0438  | 0.0478 | 0.0513 |
| NO <sub>2</sub> , H, CH <sub>3</sub>  | 0.0419  | 0.0507  | 0.0591 | 0.0465  | 0.0496 | 0.0557 |
| H, NO <sub>2</sub> , CH <sub>3</sub>  | 0.0413  | 0.0521  | 0.0649 | 0.0474  | 0.0546 | 0.0593 |
| CH <sub>3</sub> , H, NO <sub>2</sub>  | 0.0419  | 0.0507  | 0.0591 | 0.0428  | 0.0492 | 0.0552 |
| NO <sub>2</sub> , CH <sub>3</sub> , H | 0.0458  | 0.0591  | 0.0843 | 0.0529  | 0.0673 | 0.0742 |
| CH <sub>3</sub> , NO <sub>2</sub> , H | 0.0413  | 0.0521  | 0.0649 | 0.0472  | 0.0524 | 0.0697 |
| H, CH <sub>3</sub> , NO <sub>2</sub>  | 0.0458  | 0.0591  | 0.0843 | 0.0520  | 0.0512 | 0.0715 |

c-cation system, r-radical system, a- anionic system

**Table S7: energy of BCP for cation/anionic systems and radical system with substituted systems**



| 1,3 2                                 | Br---Br | Cl---Cl | F---F  | Br---Cl | Br---F | Cl---F |
|---------------------------------------|---------|---------|--------|---------|--------|--------|
| H, H,H                                | 0.0195  | 0.0215  | 0.0251 | 0.0205  | 0.0217 | 0.0228 |
| H, H,H                                | 0.0098  | 0.0109  | ----   | 0.0110  | 0.0101 | 0.0108 |
| H, H,H                                | 0.0157  | 0.0165  | 0.0173 | 0.0154  | 0.0170 | 0.0171 |
| NO <sub>2</sub> , H, H                | 0.0167  | 0.0175  | 0.0184 | 0.0163  | 0.0181 | 0.0181 |
| H, NO <sub>2</sub> , H                | 0.0177  | 0.0182  | 0.0197 | 0.0176  | 0.0192 | 0.0195 |
| H, H, NO <sub>2</sub>                 | 0.0167  | 0.0175  | 0.0184 | 0.0164  | 0.0182 | 0.0181 |
| CH <sub>3</sub> , H, H                | 0.0169  | 0.0181  | 0.0188 | 0.0176  | 0.0188 | 0.0189 |
| H, CH <sub>3</sub> , H                | 0.0177  | 0.0192  | 0.0205 | 0.0186  | 0.0199 | 0.0203 |
| H, H, CH <sub>3</sub>                 | 0.0169  | 0.0181  | 0.0188 | 0.0176  | 0.0187 | 0.0189 |
| NO <sub>2</sub> , H, CH <sub>3</sub>  | 0.0180  | 0.0191  | 0.0206 | 0.0187  | 0.0199 | 0.0202 |
| H, NO <sub>2</sub> , CH <sub>3</sub>  | 0.0195  | 0.0199  | 0.0229 | 0.0193  | 0.0214 | 0.0218 |
| CH <sub>3</sub> , H, NO <sub>2</sub>  | 0.0180  | 0.0191  | 0.0206 | 0.0169  | 0.0194 | 0.0202 |
| NO <sub>2</sub> , CH <sub>3</sub> , H | 0.0210  | 0.0231  | 0.0289 | 0.0219  | 0.0265 | 0.0276 |
| CH <sub>3</sub> , NO <sub>2</sub> , H | 0.0195  | 0.0199  | 0.0229 | 0.0208  | 0.0215 | 0.0262 |
| H, CH <sub>3</sub> , NO <sub>2</sub>  | 0.0210  | 0.0231  | 0.0289 | 0.0215  | 0.0199 | 0.0265 |

c-cation system, r-radical system, a- anionic system

**Table S8: ellipticity of BCP for cation/anionic systems and radical system with substituted systems**

| 1,3 2                                 | Br---Br | Cl---Cl | F---F  | Br---Cl | Br---F | Cl---F |
|---------------------------------------|---------|---------|--------|---------|--------|--------|
| H, H,H                                | 0.0555  | 0.0071  | 1.1770 | 0.0328  | 0.1227 | 0.1706 |
| H, H,H                                | 0.0306  | 0.0678  | ----   | 0.0307  | 0.4082 | 0.5341 |
| H, H,H                                | 0.0940  | 0.0959  | 1.3672 | 0.0497  | 0.1170 | 0.0617 |
| NO <sub>2</sub> , H, H                | 0.0433  | 0.0865  | 1.7219 | 0.0271  | 0.0563 | 0.0869 |
| H, NO <sub>2</sub> , H                | 0.0389  | 0.0886  | 0.4968 | 0.0842  | 0.0268 | 0.0335 |
| H, H, NO <sub>2</sub>                 | 0.0433  | 0.0865  | 1.7219 | 0.0381  | 0.0345 | 0.0842 |
| CH <sub>3</sub> , H, H                | 0.1028  | 0.1100  | 0.6385 | 0.0998  | 0.0199 | 0.0296 |
| H, CH <sub>3</sub> , H                | 0.0933  | 0.1010  | 0.4723 | 0.0951  | 0.0203 | 0.0258 |
| H, H, CH <sub>3</sub>                 | 0.1028  | 0.1100  | 0.6385 | 0.1118  | 0.0004 | 0.0198 |
| NO <sub>2</sub> , H, CH <sub>3</sub>  | 0.1111  | 0.1049  | 0.6597 | 0.1070  | 0.0806 | 0.0368 |
| H, NO <sub>2</sub> , CH <sub>3</sub>  | 0.0473  | 0.0995  | 0.2957 | 0.1048  | 0.0158 | 0.0012 |
| CH <sub>3</sub> , H, NO <sub>2</sub>  | 0.1111  | 0.1049  | 0.6597 | 0.0795  | 0.0932 | 0.0417 |
| NO <sub>2</sub> , CH <sub>3</sub> , H | 0.0893  | 0.0919  | 0.2309 | 0.0794  | 0.0287 | 0.0131 |
| CH <sub>3</sub> , NO <sub>2</sub> , H | 0.0473  | 0.0995  | 0.2957 | 0.0838  | 0.1007 | 0.0081 |
| H, CH <sub>3</sub> , NO <sub>2</sub>  | 0.0893  | 0.0919  | 0.2309 | 0.0988  | 0.0488 | 0.0019 |

c-cation system, r-radical system, a- anionic system
